# Supplementary material
Source: publisher site journal article supplement (https://www.dovepress.com/article/77677)

**Figure S1 Crude means and standard deviations of cognitive functioning, depression, and current health perceptions over time, for intervention and control hospitals**

2a: Cognitive functioning at baseline, 3 month, and 12 month follow up

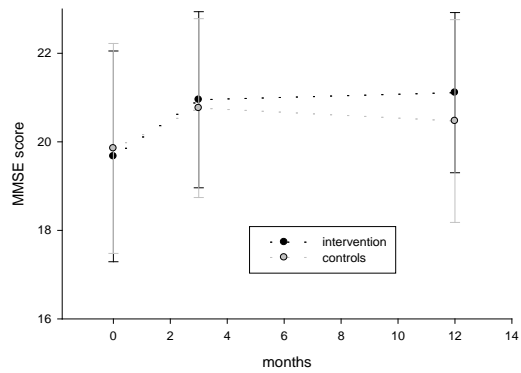

2b: Depression at baseline, 3 and 12 month follow up

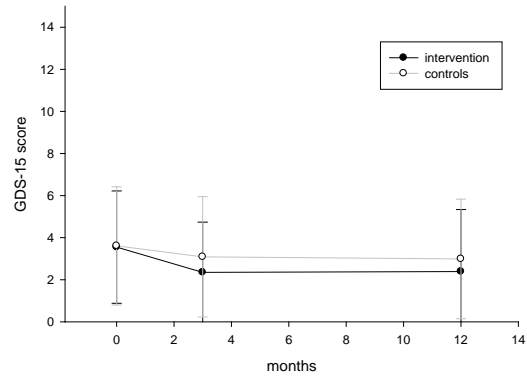

2c: Current health perceptions at baseline, 3 and 12 month follow up

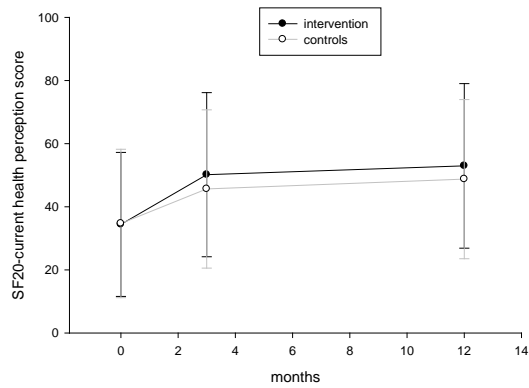

Supplement: Supplementary file 1 [file get_supplementary_file.php]
