# Supplementary material
Source: publisher site journal article supplement (https://www.dovepress.com/article/77677)
Supplement: Supplementary file 2 [file get_supplementary_file.php]

**Table S3 Prevention and reactivation Care Program patients' destinations after hospital discharge.**

| <b>Destination</b>                  | <b>(N=699)</b> |
|-------------------------------------|----------------|
|                                     | <b>n(%)</b>    |
| Home                                | <b>449(68)</b> |
| Home with homecare                  | <b>47(7)</b>   |
| Home with outpatient rehabilitation | <b>50(8)</b>   |
| Home with daycare nursing home      | <b>4(0.6)</b>  |
| Elderly home                        | <b>13(2)</b>   |
| Nursing home (short term)           | <b>22(3)</b>   |
| Nursing home (long term)            | <b>10(1)</b>   |
| Other hospital                      | <b>5(1)</b>    |
| Other rehabilitation center         | <b>11(2)</b>   |
| Other/Unknown                       | <b>88(13)</b>  |
